# Supplementary material
Source: publisher figshare collection journal article supplement (https://sage.figshare.com/ndownloader/files/14870099)

**A** Begg's funnel plot with pseudo 95% confidence limits

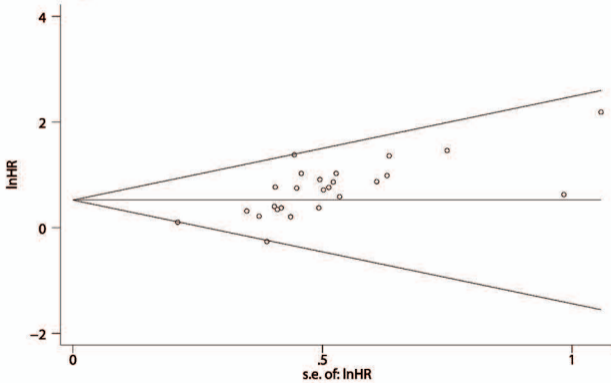

**B** Filled funnel plot with pseudo 95% confidence limits

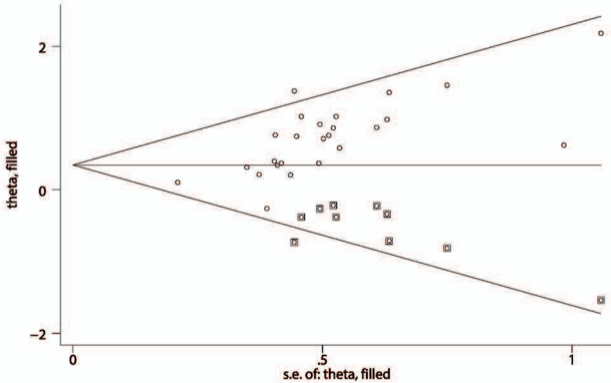

Supplement: Supplementary file 1 [file 14870099]
